# Supplementary material
Source: Research Square preprint supplement (doi:10.21203/rs.3.rs-9750241/v1)
Supplement: Supplementary file 1 [file 0441b687c7eddcdf735a66bc.docx]

**Mathematics Teacher 1**

1. **What is your qualification**

*Mathematics Teacher 1: BSC mathematics*

1. **Do you have any knowledge on welding and fabrication?**

*Mathematics Teacher 1: No, I don’t know anything about welding and I haven’t done any course relating to welding and fabrication.*

1. **Can you provide examples of specific mathematical concepts in the syllabus that are particularly important for welding and fabrication industry?**

Mathematics Teacher 1: *I don’t know specific mathematics topics that are used in welding but I can only talk about measurement.*

1. **How do you contextualize your mathematics teaching to help students understand how mathematics is used in the welding and fabrication trade area**

Mathematics Teacher 1:*The mathematics is a core subject for all TVET students and is not linked to specific program like welding and fabrication. We teach them the mathematics as it is in the syllabus and it is up to the students to apply what they learn in their profession. I for instance haven't studied welding before so how can I link the questions to welding and fabrication.*

1. **How does the content of the mathematics you teach enhance students’ success in welding and fabrication trade area?**

Mathematics Teacher 1: *The nature of the students' final exams is pure mathematics content for all the students so we teach in line with the exams questions because students are expected to pass the exams. For example, the 2024 mathematics paper I and II have only mathematics concepts and it is not linked to any specific trade area. So I don't think the mathematics content actually help the students in their trade area.*

**Mathematics Teacher 2**

1. **What is your qualification**

*Mathematics Teacher 2: Bachelor of Education (mathematics)*

1. **Do you have any knowledge on welding and fabrication?**

*Mathematics Teacher 2: I have degree in mathematics but haven't done anything in welding; I know welding is mending metals together.*

1. **Can you provide examples of specific mathematical concepts in the syllabus that are particularly important for welding and fabrication industry?**

Mathematics Teacher 2: *Please I cannot answer the questions on the specifics mathematics concepts that are related to welding. In fact, I do not know specific topics that are needed in welding and fabrication. That is why I said you should ask the welding teachers. Can we say scale because before you can’t even draw the thing, you have to use scale?*

1. **How do you contextualize your mathematics teaching to help students understand how mathematics is used in the welding and fabrication trade area**

Mathematics teacher 2:*I don't link the mathematics to welding and fabrication. I only teach the mathematics as it is.*

1. **How does the content of the mathematics you teach enhance students’ success in welding and fabrication trade area?**

Mathematics Teacher 2: *I cannot actually tell, I think welding and fabrication teachers can be in best position to explain this to you. Because I don’t know much about welding and fabrication, so can tell you the exact mathematics needed in the trade area but welding teachers may know much.*

**Mathematics Teacher 3**

1. **What is your qualification**

*Master of philosophy Mathematics education, BSC mathematics and Statistics.*

1. **Do you have any knowledge on welding and fabrication?**

*Mathematics Teacher 3:I have no idea about welding, I only see welders mending metals and making metal doors, burglar proof etc. in school I haven’t lean anything relating to welding. So I don’t have formal knowledge on welding and fabrication.*

1. **Can you provide examples of specific mathematical concepts in the syllabus that are particularly important for welding and fabrication industry?**

Mathematics Teacher 3: *this is a difficult question for me to answer but I know the use steel tape to measure the metals before cutting. I also think that they will need geometry and may be total surface area even though I am not certain.*

1. **How do you contextualize your mathematics teaching to help students understand how mathematics is used in the welding and fabrication trade area.**

*Please who does contextualization means. Oh okay, you mean if I link the mathematics examples to welding. The simple answer is no. In fact, I select the examples from the textbooks and past questions. The mathematics is cire subject, so all students are taught the same thing. Besides, I do not teach only welding and fabrication class but other tvet students mathematics.*

1. **How does the content of the mathematics you teach enhance students’ success in welding and fabrication trade area?**

*This one, I don’t know. But I know they apply mathematics in welding and fabrication but how it helps them specifically, I cant tell since I am not into welding and fabrication.*

**Mathematics Teacher 4**

a. **What is your qualification?**

*Mathematics Teacher 4: Bachelor of Education Mathematics and Postgraduate Diploma in Education.*

b. **Do you have any knowledge on welding and fabrication?**

*Not really. From the layman view, welding is joining metals together as I have been observing daily but I do not have any technical knowledge on it. This is because it wasn’t part of my training.*

**c. Can you provide examples of specific mathematical concepts in the syllabus that are particularly important for the welding and fabrication industry?**

*I think students needs measurement, mensuration and geometry, scale because they have to measure materials, determine sizes and transfer measurement. But I cannot tell you on authority the specific mathematics concepts these students needs in their welding industry. I think welders from technical universities and the teachers teaching welding can help you answer this question more.*

d. **How do you contextualize your mathematics teaching to help students understand how mathematics is used in the welding and fabrication trade area?**

*To be honest, I do not provide specific examples that is link to welding and fabrication. I only select examples that are possible examination questions which students are likely to be assessed on in their final examination. Most of these examples can be found in the textbooks and past examination questions. The fact is that their final examination questions are general like the WASSCE so they don’t need specific examples in their course area to pass.*

e. How does the content of the mathematics you teach enhance students’ success in the welding and fabrication trade area?

*I know mathematics help the students by enhancing their problem-solving skills and foundation but I think it is the duty of the welding teachers to link it to their work area or the students should be able to apply the mathematics concept when face problems that are linked mathematically. This is because the syllabus does not stress on making such connections.*

**Mathematics Teacher 5**

a. **What is your qualification?**

*Mathematics Teacher 5: Bachelor of Education in Mathematics. MSC Applied mathematics*

b. **Do you have any knowledge on welding and fabrication?**

*I know welders join metal parts to make thanks, metal frames and also make structures but I have had formal training knowledge on that. I haven’t done any course relating to welding even though during the apply mathematics programme, we did a lot of modeling in different areas but welding wasn’t part of it.*

c**. Can you provide examples of specific mathematical concepts in the syllabus that are particularly important for the welding and fabrication industry?**

*I know topics like ratio, scale, measure may be relevant to welding and fabrication but I do not know the specific concepts that area used. For example, a welder needs to make estimates of metals before starting a given project.*

d**. How do you contextualize your mathematics teaching to help students understand how mathematics is used in the welding and fabrication trade area?**

*All TVET students are taught using the same syllabus and text books so we don’t tailor to any occupation. The mathematics syllabus is a general syllabus for all programmes and as a result we teach according to the syllabus. So, the mathematics is more of general rather than specific trade area.*

1. **How does the content of the mathematics you teach enhance students’ success in the welding and fabrication trade area?**

*I can’t talk much about the practical aspects of the mathematics in terms of welding but I think it enhances their problem solving and computational skills. For example, if a student face problem that requires surface area of prism, they can apply the knowledge from mathematics to that area.*

**Mathematics Teacher 6**

a. **What is your qualification?**

*Master of Education in Mathematics Education. BSC mathematics, post diploma in Education.*

**b. Do you have any knowledge on welding and fabrication?**

*No, I don’t have any knowledge on welding and fabrication. My area is mathematics education. At the university I specialized on mathematics and physic education but have no professional knowledge in welding and fabrication.*

c. **Can you provide examples of specific mathematical concepts in the syllabus that are particularly important for the welding and fabrication industry?**

*I can talk about shapes, measurement, angles and geometry but I can’t tell more on the mathematics required for welding.*

**d. How do you contextualize your mathematics teaching to help students understand how mathematics is used in the welding and fabrication trade area?**

*I don’t intentionally link the mathematics to welding and fabrication but sometimes we come across a question that involve some metal work. Beside the mathematics is core and everyone is doing it so there is no need to link it to a particular programme.*

**e. How does the content of the mathematics you teach enhance students’ success in the welding and fabrication trade area?**

*The mathematics help students to develop problem solving, logical thinking skills but as how they are able to transfer the knowledge to the work area depends on the students. I think it is the duty of the welding teachers to help the students use the mathematics to solve problem during practical section.*

**Mathematics Teacher 7**

**a. What is your qualification?**

*Bachelor of Science in Mathematics Education.*

**b. Do you have any knowledge on welding and fabrication?**

*Yes, I have little knowledge about welding. I know it involves cutting metals, joining metal and shaping metals. All these are layman view. However, I have not received any formal education on welding.*

**c. Can you provide examples of specific mathematical concepts in the syllabus that are particularly important for the welding and fabrication industry?**

*I think topics like area, perimeter, volume, measurement and ration will be needed when forming shapes and welding them. This is because welder makes different shapes so area and volume will be very relevant.*

**d. How do you contextualize your mathematics teaching to help students understand how mathematics is used in the welding and fabrication trade area?**

*I don’t have enough ideas about welding, so I don’t contextualize the mathematics content. I teach with the expectation of the syllabus and the students final examination. I also think trying to link the content to every programme may waste time which can prevent me from completing the syllabus thereby affecting students’ final examination in core mathematics.*

e. **How does the content of the mathematics you teach enhance students’ success in the welding and fabrication trade area?**

*I think we give the students general mathematics so they need to apply it themselves to solve the problem in welding and fabrication. I therefore think everything depends on the seriousness of the students to be able to apply the mathematics or not in their occupational area.*
