# Supplementary material
Source: Research Square preprint supplement (doi:10.21203/rs.3.rs-9750241/v1)
Supplement: Supplementary file 2 [file 5bf8d6fd99b6b7fcdf441e5f.docx]

Table A5. Illustrative Coding and Theme Development Process

| **Raw Interview Excerpts** | **Initial Codes** | **Subcategory** | **Category** | **Theme** | **Theoretical Lens** |
| --- | --- | --- | --- | --- | --- |
| “I don't know anything about welding and I haven't done any course relating to welding and fabrication.” (MT1) • “I have a degree in mathematics education but haven't done anything in welding.” (MT2) • “I have no idea about welding; I only see welders mending metals.” (MT3) | No welding training; No formal welding background; Lack of vocational preparation | Lack of vocational exposure | Limited Trade-Specific Knowledge | Fragmented Integration Capacity | TPACK |
| “I don't know specific mathematics topics that are used in welding.” (MT1) • “I cannot answer the question on the specific mathematics concepts related to welding.” (MT2) • “I think they need geometry and total surface area even though I am not certain.” (MT3) | Unable to identify welding mathematics; Uncertainty about trade-relevant concepts; Reliance on assumptions | Weak awareness of workplace mathematics | Weak Understanding of Workplace Mathematics | Fragmented Integration Capacity | TPACK |
| “We teach the mathematics as it is in the syllabus.” (MT1) • “I only teach the mathematics as it is.” (MT2) • “The mathematics is a core subject, so all students are taught the same thing.” (MT3) | Teach syllabus as written; Generic mathematics instruction; Examination-oriented teaching | Examination-oriented instructional practice | Abstract and Examination-Oriented Teaching | Constrained Conditions for Knowledge Transfer | Transfer of Learning |
| “It is up to the students to apply what they learn.” (MT1) • “The vocational teachers are the ones who show students how to use it.” (MT7) • “Students are expected to apply the mathematics knowledge during their practical lessons.” (MT4) | Students expected to transfer knowledge independently; Application delegated to vocational teachers | Separation of instructional responsibility | Limited Explicit Transfer Opportunities | Constrained Conditions for Knowledge Transfer | Transfer of Learning |
| “I select examples from textbooks and past questions.” (MT3) • “I do not provide specific examples linked to welding and fabrication.” (MT4) • “I rarely use welding-related examples because I do not have enough knowledge of the trade.” (MT7) | Use of textbook examples; No welding-related examples; Reliance on generic examples | Lack of occupational contextualisation | Absence of Authentic Vocational Contexts | Decontextualised Learning Environments | Situated Learning |
| “There is no special mathematics for welding students.” (MT4) • “All TVET students are taught using the same syllabus.” (MT5) • “The mathematics syllabus is a general syllabus for all programmes.” (MT5) | Same mathematics for all trades; Uniform curriculum; General syllabus | Trade-neutral curriculum structure | Generic Curriculum Implementation | Decontextualised Learning Environments | Situated Learning |
| “The main focus is helping students pass the mathematics exams.” (MT4) • “We teach in line with the examination questions.” (MT1) • “If the examination does not ask trade-based questions, it becomes difficult to spend time on those areas.” (MT4) | Teach for examinations; Examination determines instructional priorities | Assessment-centred instruction | Assessment-Driven Instruction | Systemic Stabilisation of Trade-Blind Mathematics Instruction | Integrated Framework |
| “The main thing is to complete the syllabus.” (MT4) • “All mathematics topics are general.” (MT4) • “There is no need to link it to the students' course area before they pass.” (MT6) | Syllabus coverage pressure; General curriculum requirements; Lack of trade-specific curriculum | Curriculum compliance and structural constraints | Curriculum and Structural Constraints | Systemic Stabilisation of Trade-Blind Mathematics Instruction | Integrated Framework |
