# Supplementary material
Source: Research Square preprint supplement (doi:10.21203/rs.3.rs-9750241/v1)
Supplement: Supplementary file 3 [file a80d21c9de8357d3de949c7a.docx]

**Appendix A: Semi-Structured Interview Guide for Mathematics Teachers**

Study Title: Trade-Blind Mathematics Instruction and Mathematics–Vocational Misalignment in Competency-Based TVET in Ghana

**Introduction**

Thank you for agreeing to participate in this interview. This study seeks to explore the extent to which mathematics instruction supports the development of competencies required in the Welding and Fabrication (WF) trade area within competency-based Technical and Vocational Education and Training (TVET) institutions in Ghana. The interview focuses on your experiences as a mathematics teacher, your knowledge of the welding and fabrication trade area, and your perspectives on the contribution of mathematics to students’ vocational competence.

Your participation is voluntary, and all information provided will be treated confidentially. The interview is intended solely for academic research purposes. There are no right or wrong answers; the study is interested in your honest views and experiences. With your permission, the interview will be audio-recorded to ensure accuracy in transcription and analysis. Any identifying informat

**Demographic Characteristics**

a. What is your educational qualification?

b. Do you have any knowledge on Welding and Fabrication Technology?

**The Extent to Which the Content in the Mathematics Curriculum Facilitates the Achievement of Competencies Required in the WF Trade Area**

1. Can you provide examples of specific mathematical concepts in the syllabus that are particularly important for students to grasp in order to succeed in the welding and fabrication industry?
2. How do you contextualize your mathematics teaching to help students understand how mathematics is used in the welding and fabrication trade area?
3. How do you assess students' mathematical competency in relation to their welding and fabrication skills?
4. How does the content of mathematics enhance students’ success in the welding and fabrication trade area?

**Conclusion**

Thank you for taking the time to participate in this interview. Your responses have provided valuable insights into the relationship between mathematics instruction and vocational competence within Welding and Fabrication programmes. The information you have shared will contribute to a better understanding of how mathematics supports competency development in TVET and may inform future curriculum and instructional improvements.

All information provided will remain confidential and will be reported anonymously. If you wish to add any further comments or clarifications regarding mathematics instruction and Welding and Fabrication, you are welcome to do so at this stage.

Thank you once again for your participation and contribution to this study.
